# Supplementary material for: Pleiotropic mutations can rapidly evolve to directly benefit self and cooperative partner despite unfavorable conditions
Source: eLife. 2021 Jan 27;10:e57838. doi: 10.7554/eLife.57838 (PMC8184212; doi:10.7554/eLife.57838)
Supplement: Figure 2—figure supplement 2—source data 1. [file elife-57838-fig2-figsupp2-data1.xlsx]

## Sheet: Sheet1
T2= 8 hr	anc/ecm21	cell/mL	cell/mL	cell/mL	cell/mL	cell/mL	2*SD	2*SD	2*SD	2*SD	2*SD			mutant-anc
#2	hrs	[total]	[dead]	[Live]	[R] ecm21	[B] anc	[total]	[dead]	[Live]	[R]	[B]	[R]/[B]	ln(ratio)	fitness difference (/hr)
0	0	4.2596e+06	5378.69	4.2596e+06	456.163	4.18361e+06	525316	1948.93	525316	303.605	525713	0.000109036	-9.12383
1	9	3.69017e+06	132982	3.55364e+06	4400.86	3.5116e+06	327178	21571.8	308038	1213.26	289770	0.00125323	-6.68203
2	17	3.09411e+06	88216.7	3.00459e+06	105277	2.86747e+06	156306	1985.59	168144	9437.62	170783	0.0367143	-3.30459
3	20	3.11898e+06	78401.2	3.04176e+06	269050	2.68023e+06	193089	7663.86	190096	8396.45	188830	0.100383	-2.29876
4	23.25	3.75387e+06	75427.9	3.67916e+06	713661	2.71629e+06	416236	8979.09	429479	81095.4	333455	0.262734	-1.33661
5	26.25	3.84511e+06	82460	3.76072e+06	1.38854e+06	2.34677e+06	415189	8954.16	395944	144666	256897	0.591682	-0.524786
6	32	3.79086e+06	102528	3.68579e+06	2.39929e+06	1.25641e+06	401636	18679.7	381024	232665	166693	1.90964	0.646917	0.321733
7	44	2.63307e+06	60692.5	2.57421e+06	2.31198e+06	254266	286073	11851.5	268262	232862	43260.5	9.09276	2.20748
T2= 8 hr	anc/ecm21	cell/mL	cell/mL	cell/mL	cell/mL	cell/mL	2*SD	2*SD	2*SD	2*SD	2*SD
#3	hrs	[total]	[dead]	[Live]	[R] ecm21	[B] anc	[total]	[dead]	[Live]	[R]	[B]	[R]/[B]
0	0	4.34651e+06	9378.14	4.3364e+06	457.746	4.29677e+06	508043	4043.56	525389	1122.98	520596	0.000106533	-9.14706
1	9	3.64666e+06	92842	3.55183e+06	3844.78	3.5148e+06	424138	10510.2	420837	773.886	407948	0.00109388	-6.81802
2	17	3.27846e+06	89532.3	3.17927e+06	100156	3.04148e+06	322668	4536.66	322767	15110.9	340708	0.0329302	-3.41336
3	20	3.42284e+06	80409.7	3.33432e+06	279041	3.00478e+06	311175	5154.17	309371	21776.7	285988	0.0928656	-2.3766
4	23.25	3.93181e+06	80375	3.85347e+06	761274	2.94201e+06	218105	13216.1	227454	25225	194538	0.25876	-1.35185
5	26.25	4.53164e+06	91934.6	4.44007e+06	1.61656e+06	2.79534e+06	735042	7863.6	728636	277753	443561	0.578306	-0.547652
6	32	4.7195e+06	157708	4.56203e+06	2.69311e+06	1.83742e+06	338586	6567.99	329270	192047	138336	1.4657	0.382335	0.318541
7	44	2.994e+06	69757.8	2.92014e+06	2.55279e+06	353961	462344	7732.2	467579	388733	57522.3	7.21207	1.97576
T2= 8 hr	anc/ecm21	cell/mL	cell/mL	cell/mL	cell/mL	cell/mL	2*SD	2*SD	2*SD	2*SD	2*SD
#6	hrs	[total]	[dead]	[Live]	[R] ecm21	[B] anc	[total]	[dead]	[Live]	[R]	[B]	[R]/[B]
0	0	1.30745e+06	4755.87	1.3026e+06	146.149	1.28559e+06	67660.7	582.822	67486	142.449	60014.1	0.000113683	-9.0821
1	9	3.72542e+06	84753	3.64089e+06	2202.39	3.50008e+06	296828	1283.66	295581	1269.98	307929	0.00062924	-7.371
2	17	2.99035e+06	87583.3	2.89627e+06	49533	2.81493e+06	273966	12558.3	243143	7512.42	275033	0.0175965	-4.04005
3	20	3.08496e+06	97878.1	2.98543e+06	116814	2.81625e+06	367983	15646.6	353069	15267.2	345090	0.0414787	-3.18258
4	23.25	3.71593e+06	111967	3.5998e+06	368292	3.01308e+06	112030	7518.16	117879	23077.1	112030	0.122231	-2.10184
5	26.25	3.86939e+06	121882	3.74886e+06	880973	2.83609e+06	356573	13398	354739	87781.5	274068	0.31063	-1.16915
6	32	4.34462e+06	166663	4.18165e+06	2.18634e+06	1.95021e+06	118377	21805.2	104456	65322.8	29103.1	1.12108	0.114292	0.305376
7	44	3.38078e+06	143009	3.23874e+06	2.73405e+06	487242	272161	12727.9	276234	235548	45041.8	5.61128	1.72478
T2= 8 hr	anc/ecm21	cell/mL	cell/mL	cell/mL	cell/mL	cell/mL	2*SD	2*SD	2*SD	2*SD	2*SD
#7	hrs	[total]	[dead]	[Live]	[R] ecm21	[B] anc	[total]	[dead]	[Live]	[R]	[B]	[R]/[B]
0	0	1.40437e+06	6455.61	1.3979e+06	127.458	1.3818e+06	119939	1721.07	125506	49.4527	127283	9.22406e-05	-9.29111
1	9	3.76535e+06	83867.7	3.68361e+06	2975.19	3.5669e+06	161241	5595.38	145102	1740.14	149842	0.000834109	-7.08915
2	17	3.73326e+06	121070	3.62118e+06	55164.2	3.53708e+06	182057	8396.72	164632	1943.49	165575	0.015596	-4.16074
3	20	3.09483e+06	107658	2.98881e+06	155234	2.79803e+06	252176	11083	239875	23260.4	224563	0.0554796	-2.89174
4	23.25	3.41972e+06	92792.5	3.33273e+06	472024	2.77387e+06	145852	16372.7	153278	24766.8	118682	0.170168	-1.77097
5	26.25	4.19683e+06	107603	4.09043e+06	1.20946e+06	2.84206e+06	53635.8	14193.6	36536.6	16808.9	28800.5	0.42556	-0.85435
6	32	4.69265e+06	145598	4.54375e+06	2.48914e+06	2.00903e+06	404626	10235	378975	197851	195980	1.23897	0.214282	0.315999
7	44	3.48674e+06	81714.5	3.40348e+06	2.90373e+06	478326	347479	5856.01	344400	275718	59919.5	6.07062	1.80346
Problems in this reactor with bubbler attachment
													Ave:	0.315412
													2std	0.01418
