# Supplementary material for: Pleiotropic mutations can rapidly evolve to directly benefit self and cooperative partner despite unfavorable conditions
Source: eLife. 2021 Jan 27;10:e57838. doi: 10.7554/eLife.57838 (PMC8184212; doi:10.7554/eLife.57838)
Supplement: Figure 2—source data 1. [file elife-57838-fig2-data1.xlsx]

## Sheet: plotting
Date	Strain	genotype	[lys] uM	net growth rate (/hr)	[lys] uM	Ave	n	1*stdev		[lys] uM	Ave	n	1*stdev
2015-10-15	1335	anc	0	-0.01	0	-0.00181818	11	0.00683839	Anc	0	-0.00181818	11	0.00683839
2015-11-03	1335	anc	0	0					1335	0.1	0.0045	2
2016-02-09	1335	anc	0	0.006						0.31	0.0025	2
2016-02-09	1335	anc	0	-0.011						0.3135	0.015	4	0.00294392
2016-02-09	1335	anc	0	0.002						0.33	0.0155	2
2016-02-09	1335	anc	0	-0.002						0.627	0.02525	8	0.00656288
2016-02-23	1335	anc	0	0.004						0.66	0.0235	2
2016-02-23	1335	anc	0	0.001						0.94	0.0276667	3	0.0051316
2015-04-28	1335	anc	0	-0.014						0.95	0.0565	6	0.0051672
2018-04-19	1335	anc	0	0.005						1	0.041	1
2018-04-19	1335	anc	0	-0.001						1.25	0.056	3	0.0112694
2018-04-19	1335	anc	0.1	0.01	0.1	0.0045	2			1.425	0.073	1
2018-04-19	1335	anc	0.1	-0.001						1.6625	0.148833	6	0.0345914
2016-02-23	1335	anc	0.31	0.004	0.31	0.0025	2			1.75	0.162667	3	0.0132035
2015-04-28	1335	anc	0.31	0.001						1.9	0.124	1
2016-02-09	1335	anc	0.3135	0.018	0.3135	0.015	4	0.00294392		2.375	0.313167	6	0.0525982
2016-02-09	1335	anc	0.3135	0.011						2.5	0.3398	5	0.0150897
2016-02-09	1335	anc	0.3135	0.016						3.75	0.4425	2
2016-02-09	1335	anc	0.3135	0.015						4.75	0.4836	5	0.00585662
2018-04-19	1335	anc	0.33	0.017	0.33	0.0155	2			5	0.480667	3	0.00351188
2018-04-19	1335	anc	0.33	0.014						9.5	0.500833	6	0.00757408
2015-11-03	1335	anc	0.627	0.03	0.627	0.02525	8	0.00656288		10	0.499	5	0.00547723
2016-02-09	1335	anc	0.627	0.03						95	0.5025	2
2016-02-09	1335	anc	0.627	0.028						100	0.504	2
2016-02-09	1335	anc	0.627	0.028					Disomy14	0	0.00833333	9	0.00858778
2016-02-09	1335	anc	0.627	0.027					2349	0.1	0.015	2
2016-02-23	1335	anc	0.63	0.026					2261	0.31	0.0185	2
2016-02-23	1335	anc	0.63	0.023					2348	0.3135	0.0276667	3	0.00251661
2015-04-28	1335	anc	0.63	0.01						0.33	0.0305	2
2018-04-19	1335	anc	0.66	0.023	0.66	0.0235	2			0.627	0.0665	4	0.0128193
2018-04-19	1335	anc	0.66	0.024						0.63	0.063	3	0.0127671
2016-02-23	1335	anc	0.94	0.032	0.94	0.0276667	3	0.0051316		0.66	0.0835	2
2016-02-23	1335	anc	0.94	0.029						0.94	0.133	3	0.0314325
2015-04-28	1335	anc	0.94	0.022						0.95	0.195	4	0.0582809
2015-10-15	1335	anc	0.95	0.052	0.95	0.0565	6	0.0051672		1	0.179	2
2015-11-03	1335	anc	0.95	0.054						1.25	0.262667	3	0.0135769
2016-02-09	1335	anc	0.95	0.063						1.6625	0.3675	4	0.00932738
2016-02-09	1335	anc	0.95	0.052						1.75	0.399333	3	0.0105987
2016-02-09	1335	anc	0.95	0.063						2.375	0.42025	4	0.00613052
2016-02-09	1335	anc	0.95	0.055						2.5	0.419	5	0.0123491
2018-04-19	1335	anc	1	0.041	1	0.041	1			3.75	0.4315	2
2016-02-23	1335	anc	1.25	0.063	1.25	0.056	3	0.0112694		4.75	0.4285	2
2016-02-23	1335	anc	1.25	0.062						5	0.433	3	0.002
2015-04-28	1335	anc	1.25	0.043						9.5	0.43675	4	0.00585235
2015-10-15	1335	anc	1.425	0.073	1.425	0.073	1			10	0.4432	5	0.00420714
2015-10-15	1335	anc	1.6625	0.092	1.6625	0.148833	6	0.0345914		95	0.4395	2
2015-11-03	1335	anc	1.6625	0.121						100	0.4445	2
2016-02-09	1335	anc	1.6625	0.169					rsp5	0	-0.00616667	6	0.00658534
2016-02-09	1335	anc	1.6625	0.16					2475	0.1	0.036	2
2016-02-09	1335	anc	1.6625	0.172					1652	0.3135	0.185	4	0.0555278
2016-02-09	1335	anc	1.6625	0.179						0.33	0.1395	2
2016-02-23	1335	anc	1.75	0.16	1.75	0.162667	3	0.0132035		0.627	0.2525	4	0.0182665
2018-04-19	1335	anc	1.75	0.177						0.66	0.228	2
2018-04-19	1335	anc	1.75	0.151						0.95	0.328	4	0.0279285
2015-10-15	1335	anc	1.9	0.124	1.9	0.124	1			1	0.3005	2
2015-10-15	1335	anc	2.375	0.218	2.375	0.313167	6	0.0525982		1.6625	0.4095	4	0.0108781
2015-11-03	1335	anc	2.375	0.287						1.75	0.388	2
2016-02-09	1335	anc	2.375	0.349						2.375	0.458	4	0.0143062
2016-02-09	1335	anc	2.375	0.357						2.5	0.43	2
2016-02-09	1335	anc	2.375	0.337						4.75	0.4765	2
2016-02-09	1335	anc	2.375	0.331						5	0.4695	2
2016-02-23	1335	anc	2.5	0.317	2.5	0.3398	5	0.0150897		9.5	0.46825	4	0.00892095
2016-02-23	1335	anc	2.5	0.339						10	0.478	2
2015-04-28	1335	anc	2.5	0.336						95	0.3835	2
2018-04-19	1335	anc	2.5	0.354					evo(rsp5)	0	0.01075	4	0.00708872
2018-04-19	1335	anc	2.5	0.353					1589	0.3135	0.15125	4	0.0110868
2018-04-19	1335	anc	3.75	0.445	3.75	0.4425	2			0.627	0.25375	4	0.0100789
2018-04-19	1335	anc	3.75	0.44						0.95	0.322	4	0.0145144
2015-11-03	1335	anc	4.75	0.479	4.75	0.4836	5	0.00585662		1.6625	0.39975	4	0.0151959
2016-02-09	1335	anc	4.75	0.476						2.375	0.42775	4	0.0246627
2016-02-09	1335	anc	4.75	0.49						4.75	0.427	2
2016-02-09	1335	anc	4.75	0.486						9.5	0.432	4	0.0100333
2016-02-09	1335	anc	4.75	0.487						95	0.3965	2
2016-02-23	1335	anc	5	0.484	5	0.480667	3	0.00351188	evo(ecm21)	0	0.004	4	0.00852447
2018-04-19	1335	anc	5	0.477					1595	0.3135	0.16525	4	0.0242813
2018-04-19	1335	anc	5	0.481						0.627	0.26	4	0.000816497
2015-10-15	1335	anc	9.5	0.498	9.5	0.500833	6	0.00757408		0.95	0.33275	4	0.0165806
2015-11-03	1335	anc	9.5	0.496						1.6625	0.3725	4	0.0156738
2016-02-09	1335	anc	9.5	0.498						2.375	0.392	4	0.0166733
2016-02-09	1335	anc	9.5	0.493						4.75	0.428	2
2016-02-09	1335	anc	9.5	0.513						9.5	0.41025	4	0.0437598
2016-02-09	1335	anc	9.5	0.507						95	0.374	2
2016-02-23	1335	anc	10	0.496	10	0.499	5	0.00547723	ecm21	0	0.00366667	6	0.00595539
2016-02-23	1335	anc	10	0.497					2226	0.1	0.0285	2
2015-04-28	1335	anc	10	0.494						0.3135	0.105667	3	0.0011547
2018-04-19	1335	anc	10	0.5						0.33	0.0865	2
2018-04-19	1335	anc	10	0.508						0.627	0.222	4	0.0213229
2015-10-15	1335	anc	95	0.501	95	0.5025	2			0.66	0.2135	2
2015-11-03	1335	anc	95	0.504						0.95	0.316	4	0.0460217
2016-02-23	1335	anc	100	0.501	100	0.504	2			1	0.293	2
2015-04-28	1335	anc	100	0.507						1.6625	0.39725	4	0.00771902
2015-10-15	1589	evo rsp5	0	0.006	0	0.01075	4	0.00708872		1.75	0.4005	2
2015-11-03	1589	evo rsp5	0	0.021						2.375	0.45075	4	0.0118427
2016-02-09	1589	evo rsp5	0	0.01						2.5	0.441	2
2016-02-09	1589	evo rsp5	0	0.006						3.75	0.467	2
2015-10-15	1589	evo rsp5	0.3135	0.151	0.3135	0.15125	4	0.0110868		4.75	0.4875	2
2015-11-03	1589	evo rsp5	0.3135	0.137						9.5	0.49975	4	0.00411299
2016-02-09	1589	evo rsp5	0.3135	0.164						10	0.5065	2
2016-02-09	1589	evo rsp5	0.3135	0.153						95	0.502	2
2015-10-15	1589	evo rsp5	0.627	0.264	0.627	0.25375	4	0.0100789
2015-11-03	1589	evo rsp5	0.627	0.254					grey: not plotted due to n-=1.
2016-02-09	1589	evo rsp5	0.627	0.257
2016-02-09	1589	evo rsp5	0.627	0.24
2015-10-15	1589	evo rsp5	0.95	0.34	0.95	0.322	4	0.0145144
2015-11-03	1589	evo rsp5	0.95	0.326
2016-02-09	1589	evo rsp5	0.95	0.316
2016-02-09	1589	evo rsp5	0.95	0.306
2015-10-15	1589	evo rsp5	1.6625	0.413	1.6625	0.39975	4	0.0151959
2015-11-03	1589	evo rsp5	1.6625	0.406
2016-02-09	1589	evo rsp5	1.6625	0.402
2016-02-09	1589	evo rsp5	1.6625	0.378
2015-10-15	1589	evo rsp5	2.375	0.458	2.375	0.42775	4	0.0246627
2015-11-03	1589	evo rsp5	2.375	0.431
2016-02-09	1589	evo rsp5	2.375	0.424
2016-02-09	1589	evo rsp5	2.375	0.398
2016-02-09	1589	evo rsp5	4.75	0.418	4.75	0.427	2
2016-02-09	1589	evo rsp5	4.75	0.436
2015-10-15	1589	evo rsp5	9.5	0.437	9.5	0.432	4	0.0100333
2015-11-03	1589	evo rsp5	9.5	0.441
2016-02-09	1589	evo rsp5	9.5	0.432
2016-02-09	1589	evo rsp5	9.5	0.418
2015-10-15	1589	evo rsp5	95	0.413	95	0.3965	2
2015-11-03	1589	evo rsp5	95	0.38
2015-10-15	1595	evo ecm21	0	-0.008	0	0.004	4	0.00852447
2015-11-03	1595	evo ecm21	0	0.007
2016-02-09	1595	evo ecm21	0	0.005
2016-02-09	1595	evo ecm21	0	0.012
2015-10-15	1595	evo ecm21	0.3135	0.201	0.3135	0.16525	4	0.0242813
2015-11-03	1595	evo ecm21	0.3135	0.158
2016-02-09	1595	evo ecm21	0.3135	0.147
2016-02-09	1595	evo ecm21	0.3135	0.155
2015-10-15	1595	evo ecm21	0.627	0.26	0.627	0.26	4	0.000816497
2015-11-03	1595	evo ecm21	0.627	0.261
2016-02-09	1595	evo ecm21	0.627	0.26
2016-02-09	1595	evo ecm21	0.627	0.259
2015-10-15	1595	evo ecm21	0.95	0.352	0.95	0.33275	4	0.0165806
2015-11-03	1595	evo ecm21	0.95	0.341
2016-02-09	1595	evo ecm21	0.95	0.321
2016-02-09	1595	evo ecm21	0.95	0.317
2015-10-15	1595	evo ecm21	1.6625	0.351	1.6625	0.3725	4	0.0156738
2015-11-03	1595	evo ecm21	1.6625	0.371
2016-02-09	1595	evo ecm21	1.6625	0.386
2016-02-09	1595	evo ecm21	1.6625	0.382
2015-10-15	1595	evo ecm21	2.375	0.381	2.375	0.392	4	0.0166733
2015-11-03	1595	evo ecm21	2.375	0.375
2016-02-09	1595	evo ecm21	2.375	0.41
2016-02-09	1595	evo ecm21	2.375	0.402
2016-02-09	1595	evo ecm21	4.75	0.43	4.75	0.428	2
2016-02-09	1595	evo ecm21	4.75	0.426
2015-10-15	1595	evo ecm21	9.5	0.37	9.5	0.41025	4	0.0437598
2015-11-03	1595	evo ecm21	9.5	0.375
2016-02-09	1595	evo ecm21	9.5	0.452
2016-02-09	1595	evo ecm21	9.5	0.444
2015-10-15	1595	evo ecm21	95	0.372	95	0.374	2
2015-11-03	1595	evo ecm21	95	0.376
2015-10-15	2226	ecm21	0	-0.006	0	0.00366667	6	0.00595539
2015-11-03	2226	ecm21	0	0.005
2016-02-09	2226	ecm21	0	0
2016-02-09	2226	ecm21	0	0.009
2018-04-19	2226	ecm21	0	0.01
2018-04-19	2226	ecm21	0	0.004
2018-04-19	2226	ecm21	0.1	0.032	0.1	0.0285	2
2018-04-19	2226	ecm21	0.1	0.025
2015-11-03	2226	ecm21	0.3135	0.107	0.3135	0.105667	3	0.0011547
2016-02-09	2226	ecm21	0.3135	0.105
2016-02-09	2226	ecm21	0.3135	0.105
2018-04-19	2226	ecm21	0.33	0.084	0.33	0.0865	2
2018-04-19	2226	ecm21	0.33	0.089
2015-10-15	2226	ecm21	0.627	0.251	0.627	0.222	4	0.0213229
2015-11-03	2226	ecm21	0.627	0.201
2016-02-09	2226	ecm21	0.627	0.213
2016-02-09	2226	ecm21	0.627	0.223
2018-04-19	2226	ecm21	0.66	0.222	0.66	0.2135	2
2018-04-19	2226	ecm21	0.66	0.205
2015-10-15	2226	ecm21	0.95	0.385	0.95	0.316	4	0.0460217
2015-11-03	2226	ecm21	0.95	0.292
2016-02-09	2226	ecm21	0.95	0.295
2016-02-09	2226	ecm21	0.95	0.292
2018-04-19	2226	ecm21	1	0.299	1	0.293	2
2018-04-19	2226	ecm21	1	0.287
2015-10-15	2226	ecm21	1.6625	0.408	1.6625	0.39725	4	0.00771902
2015-11-03	2226	ecm21	1.6625	0.397
2016-02-09	2226	ecm21	1.6625	0.39
2016-02-09	2226	ecm21	1.6625	0.394
2018-04-19	2226	ecm21	1.75	0.409	1.75	0.4005	2
2018-04-19	2226	ecm21	1.75	0.392
2015-10-15	2226	ecm21	2.375	0.461	2.375	0.45075	4	0.0118427
2015-11-03	2226	ecm21	2.375	0.461
2016-02-09	2226	ecm21	2.375	0.44
2016-02-09	2226	ecm21	2.375	0.441
2018-04-19	2226	ecm21	2.5	0.454	2.5	0.441	2
2018-04-19	2226	ecm21	2.5	0.428
2018-04-19	2226	ecm21	3.75	0.473	3.75	0.467	2
2018-04-19	2226	ecm21	3.75	0.461
2016-02-09	2226	ecm21	4.75	0.489	4.75	0.4875	2
2016-02-09	2226	ecm21	4.75	0.486
2018-04-19	2226	ecm21	5	0.466
2015-10-15	2226	ecm21	9.5	0.499	9.5	0.49975	4	0.00411299
2015-11-03	2226	ecm21	9.5	0.5
2016-02-09	2226	ecm21	9.5	0.495
2016-02-09	2226	ecm21	9.5	0.505
2018-04-19	2226	ecm21	10	0.513	10	0.5065	2
2018-04-19	2226	ecm21	10	0.5
2015-10-15	2226	ecm21	95	0.5	95	0.502	2
2015-11-03	2226	ecm21	95	0.504
2015-10-15	2348	disomy14	0	-0.001	0	0.00833333	9	0.00858778
2015-11-03	2348	disomy14	0	0.01
2016-02-09	2348	disomy14	0	0.004
2016-02-09	2348	disomy14	0	0.01
2016-02-23	2349	disomy14	0	0.013
2016-02-23	2349	disomy14	0	0.014
2018-04-19	2349	disomy14	0	0.02
2018-04-19	2349	disomy14	0	0.013
2015-04-28	2261	disomy14	0	-0.008
2018-04-19	2349	disomy14	0.1	0.011	0.1	0.015	2
2018-04-19	2349	disomy14	0.1	0.019
2016-02-23	2349	disomy14	0.31	0.021	0.31	0.0185	2
2015-04-28	2261	disomy14	0.31	0.016
2015-11-03	2348	disomy14	0.3135	0.025	0.3135	0.0276667	3	0.00251661
2016-02-09	2348	disomy14	0.3135	0.028
2016-02-09	2348	disomy14	0.3135	0.03
2018-04-19	2349	disomy14	0.33	0.033	0.33	0.0305	2
2018-04-19	2349	disomy14	0.33	0.028
2015-10-15	2348	disomy14	0.627	0.054	0.627	0.0665	4	0.0128193
2015-11-03	2348	disomy14	0.627	0.057
2016-02-09	2348	disomy14	0.627	0.076
2016-02-09	2348	disomy14	0.627	0.079
2016-02-23	2349	disomy14	0.63	0.074	0.63	0.063	3	0.0127671
2016-02-23	2349	disomy14	0.63	0.066
2015-04-28	2261	disomy14	0.63	0.049
2018-04-19	2349	disomy14	0.66	0.081	0.66	0.0835	2
2018-04-19	2349	disomy14	0.66	0.086
2016-02-23	2349	disomy14	0.94	0.119	0.94	0.133	3	0.0314325
2016-02-23	2349	disomy14	0.94	0.111
2015-04-28	2261	disomy14	0.94	0.169
2015-10-15	2348	disomy14	0.95	0.276	0.95	0.195	4	0.0582809
2015-11-03	2348	disomy14	0.95	0.139
2016-02-09	2348	disomy14	0.95	0.173
2016-02-09	2348	disomy14	0.95	0.192
2018-04-19	2349	disomy14	1	0.163	1	0.179	2
2018-04-19	2349	disomy14	1	0.195
2016-02-23	2349	disomy14	1.25	0.261	1.25	0.262667	3	0.0135769
2016-02-23	2349	disomy14	1.25	0.25
2015-04-28	2261	disomy14	1.25	0.277
2015-10-15	2348	disomy14	1.6625	0.369	1.6625	0.3675	4	0.00932738
2015-11-03	2348	disomy14	1.6625	0.354
2016-02-09	2348	disomy14	1.6625	0.375
2016-02-09	2348	disomy14	1.6625	0.372
2016-02-23	2349	disomy14	1.75	0.388	1.75	0.399333	3	0.0105987
2018-04-19	2349	disomy14	1.75	0.409
2018-04-19	2349	disomy14	1.75	0.401
2015-10-15	2348	disomy14	2.375	0.429	2.375	0.42025	4	0.00613052
2015-11-03	2348	disomy14	2.375	0.416
2016-02-09	2348	disomy14	2.375	0.42
2016-02-09	2348	disomy14	2.375	0.416
2016-02-23	2349	disomy14	2.5	0.412	2.5	0.419	5	0.0123491
2016-02-23	2349	disomy14	2.5	0.411
2018-04-19	2349	disomy14	2.5	0.438
2018-04-19	2349	disomy14	2.5	0.425
2015-04-28	2261	disomy14	2.5	0.409
2018-04-19	2349	disomy14	3.75	0.437	3.75	0.4315	2
2018-04-19	2349	disomy14	3.75	0.426
2016-02-09	2348	disomy14	4.75	0.424	4.75	0.4285	2
2016-02-09	2348	disomy14	4.75	0.433
2016-02-23	2349	disomy14	5	0.431	5	0.433	3	0.002
2018-04-19	2349	disomy14	5	0.433
2018-04-19	2349	disomy14	5	0.435
2015-10-15	2348	disomy14	9.5	0.43	9.5	0.43675	4	0.00585235
2015-11-03	2348	disomy14	9.5	0.444
2016-02-09	2348	disomy14	9.5	0.435
2016-02-09	2348	disomy14	9.5	0.438
2016-02-23	2349	disomy14	10	0.444	10	0.4432	5	0.00420714
2016-02-23	2349	disomy14	10	0.439
2018-04-19	2349	disomy14	10	0.45
2018-04-19	2349	disomy14	10	0.441
2015-04-28	2261	disomy14	10	0.442
2015-10-15	2348	disomy14	95	0.437	95	0.4395	2
2015-11-03	2348	disomy14	95	0.442
2016-02-23	2349	disomy14	100	0.444	100	0.4445	2
2015-04-28	2261	disomy14	100	0.445
2018-04-19	2475	rsp5	0	-0.003	0	-0.00616667	6	0.00658534
2018-04-19	2475	rsp5	0	-0.001
2015-10-15	1652	rsp5	0	-0.008
2015-11-03	1652	rsp5	0	0.001
2016-02-09	1652	rsp5	0	-0.009
2016-02-09	1652	rsp5	0	-0.017
2018-04-19	2475	rsp5	0.1	0.032	0.1	0.036	2
2018-04-19	2475	rsp5	0.1	0.04
2015-10-15	1652	rsp5	0.3135	0.267	0.3135	0.185	4	0.0555278
2015-11-03	1652	rsp5	0.3135	0.144
2016-02-09	1652	rsp5	0.3135	0.166
2016-02-09	1652	rsp5	0.3135	0.163
2018-04-19	2475	rsp5	0.33	0.138	0.33	0.1395	2
2018-04-19	2475	rsp5	0.33	0.141
2015-10-15	1652	rsp5	0.627	0.272	0.627	0.2525	4	0.0182665
2015-11-03	1652	rsp5	0.627	0.228
2016-02-09	1652	rsp5	0.627	0.253
2016-02-09	1652	rsp5	0.627	0.257
2018-04-19	2475	rsp5	0.66	0.228	0.66	0.228	2
2018-04-19	2475	rsp5	0.66	0.228
2015-10-15	1652	rsp5	0.95	0.369	0.95	0.328	4	0.0279285
2015-11-03	1652	rsp5	0.95	0.315
2016-02-09	1652	rsp5	0.95	0.307
2016-02-09	1652	rsp5	0.95	0.321
2018-04-19	2475	rsp5	1	0.3	1	0.3005	2
2018-04-19	2475	rsp5	1	0.301
2015-10-15	1652	rsp5	1.6625	0.425	1.6625	0.4095	4	0.0108781
2015-11-03	1652	rsp5	1.6625	0.401
2016-02-09	1652	rsp5	1.6625	0.409
2016-02-09	1652	rsp5	1.6625	0.403
2018-04-19	2475	rsp5	1.75	0.403	1.75	0.388	2
2018-04-19	2475	rsp5	1.75	0.373
2015-10-15	1652	rsp5	2.375	0.463	2.375	0.458	4	0.0143062
2015-11-03	1652	rsp5	2.375	0.476
2016-02-09	1652	rsp5	2.375	0.447
2016-02-09	1652	rsp5	2.375	0.446
2018-04-19	2475	rsp5	2.5	0.435	2.5	0.43	2
2018-04-19	2475	rsp5	2.5	0.425
2018-04-19	2475	rsp5	3.75	0.452
2016-02-09	1652	rsp5	4.75	0.472	4.75	0.4765	2
2016-02-09	1652	rsp5	4.75	0.481
2018-04-19	2475	rsp5	5	0.473	5	0.4695	2
2018-04-19	2475	rsp5	5	0.466
2015-10-15	1652	rsp5	9.5	0.471	9.5	0.46825	4	0.00892095
2015-11-03	1652	rsp5	9.5	0.473
2016-02-09	1652	rsp5	9.5	0.455
2016-02-09	1652	rsp5	9.5	0.474
2018-04-19	2475	rsp5	10	0.483	10	0.478	2
2018-04-19	2475	rsp5	10	0.473
2015-10-15	1652	rsp5	95	0.403	95	0.3835	2
2015-11-03	1652	rsp5	95	0.364

## Sheet: Km
WY	Genotype	Phentoype	Mean	95% CI lower bound	95% CI upper bound
1335	anc	bmax (/hr)	0.5043	0.494	0.5146
1335	anc	n	3.602	3.272	3.933
1335	anc	Km (µM)	2.106	2.049	2.162
2261	DISOMY14	bmax (/hr)	0.4418	0.4329	0.4506
2261	DISOMY14	n	3.472	3.129	3.816
2261	DISOMY14	Km (µM)	1.074	1.04	1.109
2226	ecm21Δ	bmax (/hr)	0.5063	0.4943	0.5183
2226	ecm21Δ	n	1.651	1.504	1.798
2226	ecm21Δ	Km (µM)	0.7475	0.7068	0.7882
1652, 2475	rsp5(P772L)	bmax (/hr)	0.4716	0.4493	0.4939
1652, 2475	rsp5(P772L)	n	1.478	1.194	1.761
1652, 2475	rsp5(P772L)	Km (µM)	0.5386	0.4721	0.605
