# Supplementary material for: Pleiotropic mutations can rapidly evolve to directly benefit self and cooperative partner despite unfavorable conditions
Source: eLife. 2021 Jan 27;10:e57838. doi: 10.7554/eLife.57838 (PMC8184212; doi:10.7554/eLife.57838)
Supplement: Figure 4—source data 1. [file elife-57838-fig4-data1.xlsx]

## Sheet: Fig4A CoSMODynamics
date	who	L-H+	note	H-L+ (anc)	hr	Total	Dead	Live	[L- H+]	[H- L+]	Duration	/hr	2*fitting error	Notes	cutoff: 1E8
20161213	SH	1335; 1657	anc	1340; 1342	0	35371.5	257.264	35189.9	18211.1	16978.8	46~99	0.118255	0.0184111	A (agar)
		cherry, B		G, Citrine	21	91520.9	7165.62	84326.3	38278.3	46048	46~99, H-L+	0.111787	0.0212761
					21	82168	8085.01	74101.7	31669.8	42431.9
					28	99997.6	10270.7	89814.5	24968.9	64845.6
					28	96876.1	11933.6	85008.4	27247.8	57760.7
					46	187596	35910.9	151578	55092.6	96484.9
					46	155471	33658.2	121862	41286.6	80575.3
					69.5	6.34611e+06	90680.1	6.27436e+06	1.95171e+06	4.32265e+06
					69.5	7.12615e+06	98235	7.05775e+06	2.22969e+06	4.82806e+06
					91	4.81046e+07	745214	4.71505e+07	2.33977e+07	2.37528e+07
					91	4.80622e+07	602154	4.72552e+07	2.3616e+07	2.36392e+07
					99	7.42541e+07	1.27542e+06	7.28199e+07	3.82909e+07	3.4529e+07
					99	7.1274e+07	1.1719e+06	6.99466e+07	3.59946e+07	3.3952e+07
20161213	SH	1335; 1657	anc	1340; 1342	0	35371.5	257.264	35189.9	18211.1	16978.8	46~99	0.101207	0.017724	B (agarose+0.3uM)
		cherry, B		G, Citrine	21	55029.3	1777.9	53348.8	27689.7	25659.1	46~99, H-L+	0.100744	0.0223048
					21	59595	4754.24	54940.7	29827.3	25113.5
					28	60956.5	9021.3	51959.4	28265	23694.3
					28	39493.7	3513.71	36028.3	16381.1	19647.2
					46	85811.8	19042.2	66862.7	22349.5	44513.2
					46	78241.9	17360.9	60925.2	20716.8	40208.4
					69.5	1.07915e+06	23366.4	1.0556e+06	499179	556416
					69.5	459651	29724.2	429690	287395	142294
					91	7.89967e+06	66669.1	7.81577e+06	2.43632e+06	5.37945e+06
					91	8.85763e+06	67295.2	8.76026e+06	2.799e+06	5.96125e+06
					99	5.73595e+06	91953	5.64966e+06	2.32512e+06	3.32453e+06
					99	2.20758e+07	326928	2.17205e+07	1.07532e+07	1.09674e+07
20161213	SH	1335; 1657	anc	1340; 1342	0	35371.5	257.264	35189.9	18211.1	16978.8	46~99	0.104653	0.0103516	C (agarose+0.7uM)
		cherry, B		G, Citrine	21	60888	4369.12	56677.5	33404.8	23272.7	46~99, H-L+	0.102947	0.00990333
					21	74455.2	3802.72	70748.6	43735.7	27012.9
					28	58980.5	4501.06	54497.9	28239.2	26258.7
					28	79981.1	6332.14	73740.8	40633.7	33107.1
					46	112349	15835.9	96592.1	36425.9	60166.2
					46	106699	16927.1	89899.3	31916.3	57982.9
					69.5	2.01586e+06	36755.2	1.98096e+06	726741	1.25422e+06
					69.5	1.60386e+06	41983.5	1.56282e+06	592390	970433
					91	9.23165e+06	75974.6	9.09802e+06	2.80899e+06	6.28903e+06
					91	1.11799e+07	105047	1.10609e+07	3.8006e+06	7.26034e+06
					99	2.13164e+07	243211	2.10802e+07	9.589e+06	1.14912e+07
					99	3.8139e+07	427947	3.76721e+07	1.79286e+07	1.97435e+07
20161213	SH	1335; 1657	anc	1340; 1342	0	35371.5	257.264	35189.9	18211.1	16978.8	46~99	0.113472	0.00799809	D (agarose+1.5uM)
		cherry, B		G, Citrine	21	102790	4136.55	98896.2	60137.7	38758.5	46~99, H-L+	0.110565	0.00809293
					21	92022.5	2723.5	89475	54750.9	34724.2
					28	104042	6234.6	97873.6	49674.8	48198.9
					28	83207.5	3764.74	79558.1	37780.8	41777.3
					46	183448	22559.8	161155	46571	114584
					46	175828	24666	151289	66262.1	85027.1
					69.5	3.54845e+06	41067	3.5122e+06	1.54871e+06	1.96349e+06
					69.5	3.94126e+06	81772.3	3.86664e+06	1.62211e+06	2.24453e+06
					91	2.6621e+07	232001	2.63342e+07	1.05323e+07	1.58019e+07
					91	3.33929e+07	288223	3.29409e+07	1.44632e+07	1.84777e+07
					99	6.92914e+07	782421	6.83351e+07	3.31755e+07	3.51596e+07
					99	6.87798e+07	815943	6.78717e+07	3.2109e+07	3.57627e+07
20161213	SH	2226	ecm21	1340; 1342	0	35651.4	198.696	35469.7	18938.2	16531.5	28~69	0.134589	0.0046849	A (agar)
				G, Citrine	21	114048	7663.19	106635	52593.9	54041.3	28~69, H-L+	0.1324	0.00292358
					21	109329	7638.35	102064	51162.6	50901
					28	155936	10753.4	145484	55311.7	90172.7
					28	165203	12495.6	152885	57640.4	95244.8
					46	2.09404e+06	57703.2	2.03636e+06	901933	1.13443e+06
					46	2.0101e+06	60694.8	1.95197e+06	867880	1.08409e+06
					69.5	4.01717e+07	367921	3.98934e+07	1.74008e+07	2.24925e+07
					69.5	4.10444e+07	343855	4.07621e+07	1.77642e+07	2.29979e+07
					91	1.48512e+08	1.32633e+06	1.47228e+08	4.39345e+07	1.03294e+08
					91	1.18878e+08	907562	1.18026e+08	3.92388e+07	7.87871e+07
20161213	SH	2226	ecm21	1340; 1342	0	35651.4	198.696	35469.7	18938.2	16531.5	28~69	0.131907	0.0101721	B (agarose+0.3uM)
10^8 OK				G, Citrine	21	92195.1	5914.15	86520.6	53162.6	33358	28~69, H-L+	0.13619	0.0145092
					21	91900.6	4416.08	87703.8	53794	33909.8
					28	102655	6840.73	96022.6	47127.5	48895.1
					28	90761.1	3783.86	87152.7	40950.1	46202.6
					46	746292	30612.8	715892	322033	393859
					46	669349	25013.2	643503	360017	283486
					69.5	2.152e+07	193878	2.13865e+07	8.36606e+06	1.30204e+07
					69.5	2.10631e+07	196700	2.08974e+07	7.96608e+06	1.29313e+07
					91	1.18878e+08	907562	1.18026e+08	3.92388e+07	7.87871e+07
					91	1.26888e+08	1.03045e+06	1.25942e+08	3.74664e+07	8.84753e+07
20161213	SH	2226	ecm21	1340; 1342	0	35651.4	198.696	35469.7	18938.2	16531.5	28~69	0.133785	0.00530789	C (agarose+0.7uM)
				G, Citrine	21	141949	4771.67	137546	91965.7	45580.7	28~69, H-L+	0.133205	0.00337951
					21	137180	2478.27	134832	84859.8	49972.5
					28	175996	3551.25	172718	76229.7	96488.4
					28	166387	3515.98	163118	70139.9	92978.4
					46	2.05446e+06	58745.7	1.99612e+06	1.00666e+06	989459
					46	2.4469e+06	63826.4	2.38356e+06	1.20186e+06	1.1817e+06
					69.5	4.53546e+07	478418	4.49859e+07	2.03849e+07	2.4601e+07
					69.5	4.31121e+07	496035	4.2729e+07	1.94896e+07	2.32394e+07
					91	1.73002e+08	1.48179e+06	1.71661e+08	4.93498e+07	1.22311e+08
					91	1.61165e+08	1.4496e+06	1.5982e+08	4.47396e+07	1.15081e+08
20170328	SH	1335, 1657	anc	1340; 1342	0	41113.9	194.196	41034.2	24143.7	16890.4	52~95	0.105601	0.00735406	A1, petri, agarose + 0.7 uM lysine
Plotted in Fig 3C		R,B		G, Citrine	25	80206.3	4710.53	75584.1	36955.7	38628.5	52~95, H-L+	0.11307	0.00907469
					25	76561.8	7687.93	68896.5	39892.3	29004.2
					25	67656.5	5427.5	62375	36419.3	25955.7
					33.5	76196.5	9310.87	67010.7	34564.3	32446.4
					33.5	79513	9647.68	70107.8	36140.4	33967.4
					33.5	70275.2	10521.7	59655.7	30677	28978.6
					43.5	82675.7	9441.4	74219.3	37598.6	36620.7
					43.5	87638.6	10819.2	76953.2	37543.6	39409.6
					43.5	92353.9	13834.8	78818.1	36266.4	42551.7
					51.5	101322	16535.4	84981.9	35261.4	49720.6	81346.7
					51.5	96153.2	16281.7	80084.9	35099.4	44985.5
					51.5	96354	17432	78973.4	34039.4	44934
					67	709495	32291.8	675789	459664	216125
					67	696816	34000.9	662519	455440	207079
					67	476796	31541.6	445629	301555	144074
					75	982848	37384.1	947114	592363	354750
					75	1.38508e+06	32956.9	1.35998e+06	749384	610599
					75	1.21122e+06	42100.5	1.17158e+06	672129	499452
					94.5	7.4607e+06	96310.2	7.35068e+06	1.95369e+06	5.39699e+06
					94.5	8.50884e+06	99833.2	8.40109e+06	2.40187e+06	5.99922e+06
					94.5	8.50884e+06	99833.2	8.40109e+06	2.40187e+06	5.99922e+06
20170328	SH	2226	ecm21	1340; 1342	0	39761.3	197.424	39654.6	23890.3	15764.2	25~75	0.123315	0.0035055	B1, petri, agarose + 0.7 uM lysine
				G, Citrine	25	124605	5471.01	119306	70161.1	49145.3	H-L+	0.12857	0.00567298
					25	112329	6123.89	107091	64978.1	42112.6
					25	125286	5651.33	119913	71346	48567.4
					33.5	282632	9569.79	273373	136077	137296
					33.5	311736	9521.87	302680	152837	149843
					33.5	306835	8893.59	298248	150242	148006
					43.5	1.32306e+06	27195.1	1.29733e+06	597921	699404
					43.5	1.38937e+06	25524.7	1.367e+06	618707	748297
					43.5	1.36822e+06	27834.9	1.34451e+06	622190	722317
					51.5	3.10103e+06	35809.8	3.06853e+06	1.11274e+06	1.9558e+06
					51.5	3.45706e+06	40733.7	3.42215e+06	1.27568e+06	2.14647e+06
					51.5	3.7608e+06	45629.1	3.72244e+06	1.38565e+06	2.33679e+06
					67	2.24838e+07	216347	2.23096e+07	9.20716e+06	1.31025e+07
					67	2.26591e+07	219725	2.24998e+07	9.32295e+06	1.31769e+07
					67	2.14873e+07	219993	2.13218e+07	8.88574e+06	1.24361e+07
					75	5.7961e+07	490357	5.75857e+07	2.68091e+07	3.07765e+07
					75	4.58831e+07	428745	4.55202e+07	2.11875e+07	2.43327e+07
					75	4.74037e+07	422540	4.70669e+07	2.22855e+07	2.47814e+07
20170328	SH	2349	Disomy 14	1340; 1342	0	38674.6	194.624	38516.7	22114.7	16402	43~95	0.111636	0.00687967	C, petri, agarose + 0.7 uM lysine
				G, Citrine	25	67626.7	6623.19	61823.2	31716.3	30106.9	43~95, H-L+	0.117247	0.0118603
					25	68234	6540.32	61902.1	31397.4	30504.7
					25	71121.5	6391.04	65018.1	26432.1	38586
					33.5	72331.9	11898.3	60677.4	26401.9	34275.5
					33.5	71333.9	12218.4	59401.5	25842.9	33558.6
					33.5	76491.8	13752.3	62996.4	27950.4	35046
					43.5	97194.8	19411.6	78308.6	34439.2	43869.5
					43.5	92778.2	21766.5	71320.7	30741.1	40579.6
					43.5	91407.9	23348	68350.8	28379.8	39971
					51.5	140166	13618.3	131963	75444.3	56518.4
					51.5	111448	25277.4	86497.3	38806.8	47690.5
					51.5	132789	20197	112856	50300.8	62555.1
					67	720146	43742.5	675937	473803	202133
					67	801866	38364.5	763946	495176	268770
					67	923967	42319.4	883446	561343	322103
					75	2.47488e+06	43181.7	2.4434e+06	794625	1.64878e+06
					75	2.58664e+06	55200.2	2.53524e+06	790579	1.74466e+06
					75	2.37373e+06	57084.5	2.32172e+06	763286	1.55843e+06
					94.5	1.40225e+07	158074	1.38549e+07	3.93341e+06	9.92152e+06
					94.5	1.61203e+07	193580	1.59316e+07	4.64968e+06	1.12819e+07
					94.5	2.17965e+07	262700	2.15042e+07	6.26743e+06	1.52368e+07
20170523	SH	1335	anc	1340	0	40766.6	323.776	40472	24325.1	15825.7	45~96	0.11398	0.00769492	A1
					21	77302.1	258.757	77043.4	41201.1	32613.6	45~96 H-L+	0.117768	0.012847
					21	55164.2	324.54	54839.7	29579.8	23031.8
					21	78247.3	399.426	77847.8	42869.8	31044.4
					28.25	77389.5	1061.68	76354.1	35939.4	33905.5
					28.25	88614.4	636.307	87978.1	43595.1	38252.8
					28.25	76413.1	607.845	75805.3	34550.9	34984.5
					45	121740	748.741	121113	39748	61508.9
					45	168039	1922.46	166226	61410.4	84481.2
					45	181621	2324.51	179387	59572.6	98325.8
					51.5	424672	11502.9	413465	231837	158638
					51.5	493107	10472.7	482986	283262	169454
					51.5	524708	7596.88	517315	323894	165959
					68.25	4.22116e+06	64455.5	4.16547e+06	1.21417e+06	2.90699e+06
					68.25	3.56575e+06	53572.9	3.5125e+06	1.07003e+06	2.40555e+06
					68.25	3.63112e+06	60990.4	3.56982e+06	1.06569e+06	2.46328e+06
					75.75	8.94729e+06	120367	8.82374e+06	2.50313e+06	6.27596e+06
					75.75	7.57286e+06	100011	7.47599e+06	2.09996e+06	5.33267e+06
					75.75	9.29553e+06	118331	9.17935e+06	2.67265e+06	6.44882e+06
					96.25	6.1553e+07	852081	6.05968e+07	3.18521e+07	2.83787e+07
					96.25	5.26195e+07	666625	5.19502e+07	2.71888e+07	2.4378e+07
					96.25	5.40133e+07	735976	5.32753e+07	2.73528e+07	2.55596e+07
20170523	SH	1335	anc	1340	0	144637	963.885	143674	86783.3	56497.3	45~68	0.100292	0.00431299	A2
too big of a break/too few qualifying data					21	348699	4216.11	344512	160943	166875
whether including 28 hr makes difference					21	317849	2783.5	315094	142486	158521
NOT INCLUDED IN ANALYSIS					21	338598	2298.92	336328	153860	166118
					28.25	463823	8493.84	455724	183361	236788
					28.25	502362	6761.44	495810	203469	253516
					28.25	506300	6495.51	500112	199368	259461
					45	6.92737e+06	103913	6.82721e+06	4.26393e+06	2.44204e+06
					45	7.99819e+06	112695	7.8876e+06	4.89875e+06	2.85739e+06
					45	8.25023e+06	101055	8.15274e+06	5.12259e+06	2.89161e+06
					51.5	1.49384e+07	227813	1.4709e+07	6.09327e+06	8.5008e+06
					51.5	1.5668e+07	224288	1.54469e+07	6.01401e+06	9.30548e+06
					51.5	1.5013e+07	205374	1.48037e+07	5.88243e+06	8.81647e+06
					68.25	7.71042e+07	924896	7.62344e+07	2.83169e+07	4.7338e+07
					68.25	7.6636e+07	951691	7.58109e+07	2.79013e+07	4.73956e+07
					68.25	8.55611e+07	926513	8.46493e+07	3.10723e+07	5.30983e+07
					73	1.14268e+08	2.56195e+06	1.11681e+08	3.87781e+07	7.09231e+07
					73	1.02212e+08	2.2426e+06	9.9851e+07	3.54332e+07	6.30788e+07
					73	1.10954e+08	2.17192e+06	1.09018e+08	3.82532e+07	6.96711e+07
20170523	SH	2226	ecm21	1340	0	38579.3	291.1	38250.9	22765.1	15293.8	21~73	0.125531	0.0055245	C
Plotted in Fig 3C					21	123226	422.316	122835	68794.6	50978.7	H-L+ 21~73	0.132024	0.00725596
					21	134698	779.995	133918	74453.6	56464
					21	142352	485.73	141867	80385.2	57830.4
					28.25	292784	961.578	291922	143963	139502
					28.25	300112	967.09	299177	148240	142094
					28.25	285423	977.823	284584	144778	130581
					45	3.9351e+06	28679	3.90443e+06	1.57217e+06	2.2693e+06
					45	4.37249e+06	30059.9	4.34544e+06	1.71556e+06	2.55469e+06
					45	4.25502e+06	29987.9	4.2231e+06	1.69139e+06	2.46283e+06
					51.5	7.38032e+06	31537.5	7.34599e+06	2.56525e+06	4.69807e+06
					51.5	7.97814e+06	35126.8	7.96137e+06	2.79297e+06	5.07182e+06
					51.5	7.34126e+06	29975.4	7.32392e+06	2.51864e+06	4.71954e+06
					68.25	5.52822e+07	970639	5.43506e+07	2.32777e+07	3.0863e+07
					68.25	6.1365e+07	1.10997e+06	6.02919e+07	2.59057e+07	3.41372e+07
					68.25	5.43549e+07	1.04303e+06	5.33136e+07	2.23535e+07	3.07345e+07
					73	8.70017e+07	2.20575e+06	8.45818e+07	3.34042e+07	5.08202e+07
					73	7.57697e+07	1.8455e+06	7.41103e+07	2.97898e+07	4.39564e+07
					73	7.36727e+07	1.74201e+06	7.19055e+07	2.71533e+07	4.45187e+07
20170606	SH	1335	anc	1340	0	35140.4	184.073	34951.5	21895.8	12706.8	68-94hr	0.104016	0.0148792
					26.75	77134.9	696.79	76438.1	39716.9	32323.2	H-L+68-94hr	0.116068	0.0153328
					26.75	95523.1	511.246	94981.9	48662.1	39937.3
					26.75	291215	2422.95	288313	137606	143299
					44	89927.9	1279.73	88585.2	38426.3	38997.3
					44	79431.2	1048.98	78363.3	29932.7	37838.2
					44	80449.2	482.4	79947.9	33241.9	34882.2
					52.5	120065	1997.33	117764	36215.8	62450.9
					52.5	109519	1769.66	107587	33750.6	56592.9
					52.5	95229.9	919.961	94262.1	30528.9	47551
					68.5	259747	1765.32	257783	90590.6	132787
					68.5	187628	1264.42	186296	50335.2	108015
					68.5	281963	1250.77	280601	116918	134797
					75.75	767652	15771	751220	299506	434139
					75.75	424806	11086.2	413213	172684	223254
					75.75	396966	9371.53	386916	172475	200166
					93.5	3.03116e+06	61746.2	2.96791e+06	823677	2.10821e+06
					93.5	3.68082e+06	77122.3	3.60193e+06	1.08197e+06	2.48483e+06
					93.5	3.09217e+06	66667.4	3.02408e+06	882873	2.11048e+06
20170606	SH	2226	ecm21	1340	0	37054.1	185.653	36832.9	23306.7	13173	27-72hr	0.120961	0.00331353
					19.75	123918	530.543	123318	68788.6	45714.1	H-L+ 27-72hr	0.124486	0.00639948
					19.75	99420.7	224.386	99148.8	55032.7	38882.7
					19.75	101558	285.633	101272	56156.2	41309.8
					26.75	164053	293.716	163726	84264.8	73068
					26.75	182639	165.413	182431	97182.7	78304.2
					26.75	174982	180.885	174801	91749.2	77996.4
					44	1.73128e+06	7161.18	1.72347e+06	726547	959737
					44	1.87456e+06	7078.19	1.86707e+06	775349	1.05446e+06
					44	1.8214e+06	4234.73	1.81675e+06	742703	1.0393e+06
					52.5	4.5101e+06	43853.6	4.46362e+06	1.51147e+06	2.88307e+06
					52.5	4.48715e+06	22698.3	4.46345e+06	1.52436e+06	2.88062e+06
					52.5	5.03229e+06	31693.5	4.99875e+06	1.7142e+06	3.20013e+06
					68.5	2.86228e+07	218056	2.839e+07	1.25182e+07	1.56969e+07
					68.5	2.81979e+07	176562	2.80091e+07	1.22731e+07	1.55437e+07
					68.5	3.15585e+07	186743	3.13595e+07	1.39672e+07	1.71856e+07
					72.5	4.47984e+07	23077.4	4.47708e+07	2.00761e+07	2.40686e+07
					72.5	4.69836e+07	43378.4	4.69317e+07	2.19325e+07	2.44017e+07
					72.5	4.78043e+07	41703.1	4.77626e+07	2.15845e+07	2.56979e+07
20180810	SH+AY	1335	anc	1340	0	37201	226.727	36970.9	21934.5	14810.4	48~116	0.104407	0.00909275
					48	159372	33960.5	125263	38822.5	72470.7	H-L+	0.103957	0.0109061
					48	150733	34439	116142	36141.2	71173.6	48~108	0.108389	0.0137861
					48	156505	31382.6	125008	37274.6	71796.1	H-L+	0.10776	0.00909275
					68	448376	49329.3	398727	189553	186061
					68	468447	54252.6	413863	208849	187237
					75.5	3.32941e+06	115979	3.2124e+06	1.03802e+06	2.12156e+06
					75.5	2.98065e+06	106744	2.87272e+06	950476	1.87651e+06
					91	8.92112e+06	281722	8.63849e+06	2.84182e+06	5.75693e+06
					91	9.32208e+06	294439	9.02655e+06	3.02034e+06	5.96371e+06
					99.5	3.78512e+07	984259	3.68615e+07	1.71315e+07	1.94576e+07
					99.5	2.56367e+07	794909	2.48379e+07	1.17415e+07	1.29817e+07
					107.5	6.84124e+07	1.34065e+06	6.70633e+07	2.59766e+07	3.73074e+07
					107.5	6.93273e+07	1.48398e+06	6.78322e+07	3.11898e+07	3.34627e+07
					115.75	1.04603e+08	2.60808e+06	1.01992e+08	4.09024e+07	5.98903e+07
					115.75	8.48139e+07	1.69272e+06	8.31134e+07	3.70739e+07	4.5418e+07
20180810	SH+AY	2349	Disomy	1340	0	35152.6	244.264	34905.1	19743.9	14955.6	48~100	0.108372	0.00961657
					48	426428	67909.6	358238	178340	174454	H-L+	0.1143	0.0121145
					48	421155	69655.5	351326	174937	169590
					48	350023	59612.1	290130	137904	148220
					68	4.25673e+06	141829	4.11452e+06	1.26621e+06	2.81087e+06
					68	3.90401e+06	137916	3.7657e+06	1.20105e+06	2.53407e+06
					75.5	1.34277e+07	623005	1.28021e+07	3.86913e+06	8.86707e+06
					75.5	1.4359e+07	645786	1.37117e+07	4.25564e+06	9.38669e+06
					91	3.86172e+07	2.02342e+06	3.65923e+07	1.36511e+07	2.26941e+07
					91	4.04781e+07	2.23102e+06	3.8243e+07	1.39744e+07	2.40719e+07
					99.5	9.48108e+07	4.32139e+06	9.0474e+07	2.63605e+07	6.36137e+07
					99.5	8.67178e+07	4.49168e+06	8.22187e+07	2.42071e+07	5.75321e+07
					115.75	1.30843e+08	6.05583e+06	1.24768e+08	2.45538e+07	9.88287e+07
					115.75	1.29541e+08	5.74066e+06	1.23794e+08	2.41053e+07	9.84885e+07
20190215	SH	1335	anc	1340	0	37190.3	165.766	37024.5	19731.6	17172.8	52~114	0.0977793	0.00882373
					42.25	99011	23631.5	75211.8	40107.2	15612.9	H-L+	0.104272	0.0096234
					42.25	92459.8	26868.5	65312.4	40855	15820.9
					51.75	103591	26349.3	77151.6	38142.4	25065
					51.75	103980	23866.5	79923.8	37414.6	33096.4
					65.5	280695	33238.8	247340	97153.8	139778
					65.5	224892	28850	195889	92895.3	89616.9
					72.25	235099	30661.2	204338	73094.4	118042
					72.25	467810	37324.2	430300	230063	192570
					78.5	1.03214e+06	54384.1	977406	442015	526530
					78.5	1.56157e+06	58848.6	1.5023e+06	440298	1.04556e+06
					92.5	3.26166e+06	98364.3	3.16284e+06	746048	2.39068e+06
					92.5	3.59414e+06	114866	3.47894e+06	852953	2.59863e+06
					102.25	8.83958e+06	275623	8.56346e+06	2.70963e+06	5.82317e+06
					102.25	6.72145e+06	218681	6.50215e+06	1.91169e+06	4.55318e+06
					114.5	3.14568e+07	982733	3.04696e+07	1.49923e+07	1.53802e+07
					114.5	3.99321e+07	1.16038e+06	3.87691e+07	1.95393e+07	1.90971e+07
20190215	SH	1335	anc	1340	0	32209.4	57.6804	32150.6	19295.9	12771.3	52~114	0.100792	0.00807045
					42.25	84842	22169.9	62615	34212.8	24966.8	H-L+	0.10957	0.0100761
					42.25	98547.5	26145.8	72238.6	39773	26160.5
					51.75	130431	33350.5	96880	47878.3	41705.7
					51.75	117879	30650.8	87001.1	41396.5	36069.8
					65.5	401125	45593.8	355387	212840	133106
					65.5	322118	39607.4	282328	162465	114143
					72.25	601127	45822.7	555064	353765	187573
					72.25	822246	48340.1	773729	474186	289611
					78.5	1.42207e+06	62328.8	1.35945e+06	621802	725230
					78.5	637542	46401.5	590880	344766	230907
					92.5	2.76904e+06	86829.8	2.68169e+06	718497	1.93936e+06
					92.5	5.06019e+06	123311	4.93665e+06	1.18538e+06	3.7061e+06
					102.25	1.63116e+07	375046	1.59366e+07	5.23824e+06	1.06308e+07
					102.25	1.79877e+07	411122	1.75761e+07	5.90782e+06	1.15795e+07
					114.5	4.57643e+07	990138	4.47725e+07	2.05013e+07	2.40785e+07
					114.5	4.91996e+07	1.11338e+06	4.80837e+07	2.18422e+07	2.60489e+07
20190215	SH	1335	anc	1340	0	34463.4	75.6272	34387.2	20063.3	14210.3	52~114	0.103292	0.0089062
					42.25	101576	23115.7	78298	40470.5	28211.5	H-L+	0.110441	0.0136143
					42.25	101911	21817.7	79905.2	40348	27093.2
					51.75	138716	34683.2	103853	45267.8	46190.2
					51.75	138474	33371.6	104677	43808.2	49402
					65.5	188971	38989.4	149655	49817.7	72841
					65.5	283894	51235.7	232542	116341	106791
					72.25	656894	61299	595381	399133	178744
					72.25	520537	54059.7	466218	293177	163021
					78.5	1.43224e+06	64360.2	1.36766e+06	710813	644076
					78.5	799675	54251.3	745123	497183	236976
					92.5	7.35622e+06	150486	7.20519e+06	1.8405e+06	5.29353e+06
					92.5	6.89973e+06	152768	6.74641e+06	1.8025e+06	4.87354e+06
					102.25	1.25508e+07	262799	1.22878e+07	3.52118e+06	8.71759e+06
					102.25	1.3379e+07	301413	1.30771e+07	3.82187e+06	9.2023e+06
					114.5	4.40673e+07	861114	4.32044e+07	2.07806e+07	2.22647e+07
					114.5	4.88422e+07	1.09884e+06	4.77412e+07	2.31872e+07	2.43704e+07
20190215	SH	2349	disomy14	1340	0	33747.9	164.219	33582.1	17910	15560.2	42~114	0.0952629	0.00527556
					42.25	126706	33030.4	93572.5	41589.4	44531.7	H-L+	0.102214	0.00857335
					42.25	124825	31461	93256.6	45164	38998.7
					51.75	329760	41249.6	288240	177733	101867
					51.75	368759	41482.4	326913	201632	109796
					65.5	1.27248e+06	65187.9	1.20702e+06	498969	692054
					65.5	1.58034e+06	72443.9	1.50764e+06	608574	877950
					72.25	3.43294e+06	101608	3.33091e+06	907799	2.39641e+06
					72.25	2.72803e+06	84211.6	2.64348e+06	747053	1.87081e+06
					78.5	5.26077e+06	131775	5.12864e+06	1.22649e+06	3.85998e+06
					78.5	5.34965e+06	126026	5.22308e+06	1.2181e+06	3.96794e+06
					92.5	1.71609e+07	700991	1.64586e+07	5.28497e+06	1.10997e+07
					92.5	2.13021e+07	1.15513e+06	2.01463e+07	7.45906e+06	1.25903e+07
					102.25	4.13906e+07	2.42949e+06	3.89591e+07	1.57797e+07	2.30507e+07
					102.25	3.59967e+07	2.01093e+06	3.39772e+07	1.36949e+07	1.99881e+07
					114.5	1.11011e+08	5.82039e+06	1.05175e+08	3.22737e+07	7.22199e+07
					114.5	9.15393e+07	4.69954e+06	8.68352e+07	2.82317e+07	5.81624e+07
20190215	SH	2349	disomy14	1340	0	32938.2	76.8097	32860.8	19367.9	13385.8	42~114	0.0982616	0.00751215
					42.25	128576	36345.6	92006.4	40354.7	38547.5	H-L+	0.105723	0.00986568
					42.25	150598	41212	109190	49897.9	54460
					51.75	259007	50532.1	208259	110190	84572.5
					51.75	321662	55262.2	266122	149078	103884
					65.5	1.79738e+06	94740.5	1.70232e+06	898172	787984
					65.5	1.54046e+06	83718.5	1.45638e+06	787313	654821
					72.25	4.03333e+06	129230	3.90383e+06	1.2613e+06	2.61256e+06
					72.25	3.11554e+06	112470	3.00252e+06	1.06144e+06	1.91584e+06
					78.5	7.23568e+06	168553	7.06646e+06	1.85793e+06	5.14187e+06
					78.5	6.92878e+06	158969	6.7694e+06	1.74571e+06	4.96438e+06
					92.5	1.99062e+07	758343	1.9146e+07	5.79793e+06	1.32532e+07
					92.5	2.66682e+07	1.12075e+06	2.55463e+07	8.35335e+06	1.7077e+07
					102.25	4.56295e+07	2.26182e+06	4.33616e+07	1.6158e+07	2.68605e+07
					102.25	5.64061e+07	2.88022e+06	5.35198e+07	1.89949e+07	3.40336e+07
					114.5	1.07635e+08	4.79789e+06	1.02825e+08	2.80226e+07	7.41027e+07
					114.5	9.80054e+07	4.7765e+06	9.32244e+07	2.90117e+07	6.3762e+07
20190215	SH	2349	disomy14	1340	0	29146.4	87.0857	29058.3	16421	12547.9	42~114	0.0966298	0.00603235
					42.25	123672	32674.4	90794.3	36656.5	41200.9	H-L+	0.10495	0.00979405
					42.25	140515	41247.1	99024.1	41318.2	43935.1
					51.75	305344	47013.8	258105	158206	85527.4
					51.75	209356	43479.8	165564	80551.2	73202.7
					65.5	1.02857e+06	70108.6	958338	656313	285685
					65.5	938424	67788.6	870336	592725	262778
					72.25	3.1805e+06	94264.2	3.08585e+06	939285	2.11666e+06
					72.25	2.58288e+06	86850.6	2.49557e+06	836283	1.63743e+06
					78.5	4.17019e+06	132901	4.03661e+06	1.46042e+06	2.54123e+06
					78.5	4.1862e+06	130851	4.05471e+06	1.36565e+06	2.65068e+06
					92.5	1.82727e+07	678668	1.75929e+07	5.04358e+06	1.24913e+07
					92.5	1.7036e+07	626331	1.64087e+07	4.94569e+06	1.13888e+07
					102.25	4.64877e+07	2.19734e+06	4.42892e+07	1.59917e+07	2.80285e+07
					102.25	3.36831e+07	1.58915e+06	3.20864e+07	1.15319e+07	2.03983e+07
					114.5	8.16004e+07	4.33838e+06	7.72563e+07	2.71911e+07	4.9693e+07
					114.5	7.95557e+07	4.23094e+06	7.53195e+07	2.71587e+07	4.79052e+07

## Sheet: Fig4B
anc	Time window	CoSMO growth rate (/hr)	2*fitting error	H-L+ growth rate (/hr)	2*fitting error	ecm21	Time window	CoSMO growth rate (/hr)	2*fitting error	H-L+ growth rate (/hr)	2*fitting error	DISOMY 14	Time window	CoSMO growth rate (/hr)	2*fitting error	H-L+ growth rate (/hr)	2*fitting error
20161213	46~99	0.118255	0.0184111	0.11	0.0212761	20161213	28~69	0.134589	0.0046849	0.1324	0.00292358	*These data are identical to those published earlier in
20161213	46~99	0.101207	0.017724	0.100744	0.0223048	20161213	28~69	0.131907	0.0101721	0.13619	0.0145092	Hart et al., eLife, 2019.*
20161213	46~99	0.104653	0.0103516	0.102947	0.00990333	20161213	28~69	0.133785	0.00530789	0.133205	0.00337951
20161213	46~99	0.113472	0.00799809	0.110565	0.00809293
20170328	52~95	0.105601	0.00735406	0.11307	0.00907469	20170328	25~75	0.123315	0.0035055	0.12857	0.00567298	20170328	43~95	0.111636	0.00687967	0.117247	0.0118603
20170523	45~96	0.11398	0.00769492	0.117768	0.012847	20170523	21~73	0.125531	0.0055245	0.132024	0.00725596
20170606	68-94	0.104016	0.0148792	0.116068	0.0153328	20170606	27~72	0.120961	0.00331353	0.124486	0.00639948
20180810	48~108	0.108389	0.0107177	0.10776	0.00909275							20180810	48~100	0.108372	0.00961657	0.1143	0.0121145
20190215	52~114	0.0977793	0.00882373	0.104272	0.0096234							20190215	42~114	0.0952629	0.00527556	0.102214	0.00857335
20190215	52~114	0.100792	0.00807045	0.10957	0.0100761							20190215	42~114	0.0982616	0.00751215	0.105723	0.00986568
20190215	52~114	0.103292	0.0089062	0.110441	0.0136143							20190215	42~114	0.0966298	0.00603235	0.10495	0.00979405
Summary statistics
Ave		0.106494		0.109382				0.128348		0.131146				0.102033		0.108887
2*stdev		0.0127064		0.0105137				0.0116279		0.00814954				0.0148882		0.013009
							1.20521
Statistical tests
F-test								0.895459		0.597618				0.621461		0.532002
Variance								Eq		Eq				Eq		Eq
T-test								4.5061e-06		2.7636e-07				0.236174		0.873005
Significantly different from Ancestor?								Yes		Yes				No		No
