# Supplementary material for: Pleiotropic mutations can rapidly evolve to directly benefit self and cooperative partner despite unfavorable conditions
Source: eLife. 2021 Jan 27;10:e57838. doi: 10.7554/eLife.57838 (PMC8184212; doi:10.7554/eLife.57838)
Supplement: Supplementary file 1. [file elife-57838-supp1.xlsx]

## Sheet: Sheet1
WY	Alias	Genotype
1335	ancestor	MATa ho::loxP AMN1-BY ste3::Hph fba1::FBA1-mCherry-loxP ade4::ADE4-PUR6 (o/e) lys2::loxP
1340	cooperator	MATa ho::loxP AMN1-BY ste3::NAT fba1::FBA1-EGFP-loxP lys21::LYS21(o/e) ade8::loxP
2226	ecm21	MATa ho::loxP AMN1-BY ste3::Hph fba1::FBA1-mCherry-loxP ade4::ADE4-PUR6 (o/e) lys2::loxP ecm21::NAT
2261	DISOMY14	MATa ho::loxP AMN1-BY ste3::Hph fba1::FBA1-mCherry-loxP ade4::ADE4-PUR6 (o/e) lys2::loxP chr. XIV duplication
2348	DISOMY14	MATa ho::loxP AMN1-BY ste3::Hph fba1::FBA1-mCherry-loxP ade4::ADE4-PUR6 (o/e) lys2::loxP chr. XIV duplication
2349	DISOMY14	MATa ho::loxP AMN1-BY ste3::Hph fba1::FBA1-mCherry-loxP ade4::ADE4-PUR6 (o/e) lys2::loxP chr. XIV duplication
1652	rsp5	MATalpha ho::loxP AMN1-BY fba1::FBA1-mCherry-loxP ade4::ADE4-PUR6 (o/e) lys2::loxP rsp5::rsp5(P772L)-loxP-KanMX-loxP
2475	rsp5	MATa ho::loxP AMN1-BY fba1::FBA1-mCherry-loxP ade4::ADE4-PUR6 (o/e) lys2::loxP rsp5::rsp5(P772L)-loxP-KanMX-loxP
1595	evo ecm21	a clone evolved from 1335 with mutations including ecm21 (R742*)
1589	evo rsp5	a clone evolved from 1335 with mutations including rsp5 (P772L)
1620	ancester LYP1-GFP	MATalpha ho::loxP AMN1-BY ade4::ADE4-PUR6 (o/e) lys2::loxP lyp1-GFP
1621	ancester LYP1-GFP	MATalpha ho::loxP AMN1-BY ade4::ADE4-PUR6 (o/e) lys2::loxP lyp1-GFP
2354	ecm21 LYP1-GFP	MATalpha ho::loxP AMN1-BY ade4::ADE4-PUR6 (o/e) lys2::loxP lyp1-GFP ecm21::NAT (may have fba1::FBA1-mCherry-loxP - not checked)
2355	ecm21 LYP1-GFP	MATa ho::loxP AMN1-BY ade4::ADE4-PUR6 (o/e) lys2::loxP lyp1-GFP ecm21::NAT (may have Ste3::Hph, fba1::FBA1-mCherry-loxP - not checked)
2356	rsp5 LYP1-GFP	MATalpha ho::loxP AMN1-BY ade4::ADE4-PUR6 (o/e) lys2::loxP lyp1-GFP rsp5::rsp5(P772L)-loxP-KanMX-loxP
