# Supplementary material for: Pleiotropic mutations can rapidly evolve to directly benefit self and cooperative partner despite unfavorable conditions
Source: eLife. 2021 Jan 27;10:e57838. doi: 10.7554/eLife.57838 (PMC8184212; doi:10.7554/eLife.57838)
Supplement: Table 1—source data 1. [file elife-57838-table1-data1.xlsx]

## Sheet: 9-13-18_SH_check
	NOTE - did not include intergenic SNPs unless close proximity to genes of interest (see WY1607,1608) - see VS_WY1335 text file for others
	NOTE - WY1601-1609 (chemostat strains) all contain the same mutation - assumed to be in clone picked for innoculation rather than arising during evolution
SH Checked	WY #	Alias	Derived from	compared to	Experimenter	line	Gen	Chr.	mutation type	change	coding	aa change	Standard name	Systematic Name
yes	1584	CC38RL1	1335	1335	CC	1B	24.8	2	snp	T->A	non-sense	L812*	ECM21	YBL101C
yes	1584	CC38RL1	1335	1335	CC	1B	24.8	16	snp	G->T	mis-sense	D150Y	YPL247C	YPL247C
yes	1584	CC38RL1	1335	1335	CC	1B	24.8	14	other	duplication
yes	1585	CC56RL1	1335	1335	CC	1B	48.7	1	snp	G->A	mis-sense	R89H	FRT2	YAL028W
yes	1585	CC56RL1	1335	1335	CC	1B	48.7	5	snp	G->T	mis-sense	G689C	RSP5	YER125W
yes	1585	CC56RL1	1335	1335	CC	1B	48.7	9	snp	G->A	mis-sense	E339K	SSL2	YIL143C
yes	1585	CC56RL1	1335	1335	CC	1B	48.7	14	other	duplication
yes	1586	CC74RL1	1335	1335	CC	1B	76.2	4	snp	A->T	mis-sense	Y188F	IDP1	YDL066W
yes	1586	CC74RL1	1335	1335	CC	1B	76.2	5	snp	G->T	mis-sense	G689C	RSP5	YER125W
yes	1586	CC74RL1	1335	1335	CC	1B	76.2	9	snp	G->A	mis-sense	E339K	SSL2	YIL143C
yes***	1586	CC74RL1	1335	1335	CC	1B	76.2	10	snp	C->T	silent	F65F	SOD1	YJR104C
yes	1586	CC74RL1	1335	1335	CC	1B	76.2	11	snp	C->T	non-sense	Q609*	DOA1	YKL213C
yes	1586	CC74RL1	1335	1335	CC	1B	76.2	11	snp	T->A	mis-sense	S12T	LST4	YKL176C
yes	1586	CC74RL1	1335	1335	CC	1B	76.2	13	snp	G->C	mis-sense	D580H	TSL1	YML100W
yes	1587	CC74RS2	1335	1335	CC	1B	76.2	4	snp	C->T	mis-sense	P233L	TAF12	YDR145W
yes	1587	CC74RS2	1335	1335	CC	1B	76.2	5	snp	G->T	mis-sense	G689C	RSP5	YER125W
yes	1587	CC74RS2	1335	1335	CC	1B	76.2	12	snp	A->del	frameshift	I68frameshift	SFP1	YLR403W
yes	1587	CC74RS2	1335	1335	CC	1B	76.2	14	other	duplication
yes	1588	CC45RL1	1335	1335	CC	1A	23.9	2	snp	G->T	non-sense	E316*	ECM21	YBL101C
yes	1588	CC45RL1	1335	1335	CC	1A	23.9	4	snp	C->T	mis-sense	S415L	FIT1	YDR534C
yes	1588	CC45RL1	1335	1335	CC	1A	23.9	16	snp	G->A	silent	K7K	ACM1	YPL267W
yes	1588	CC45RL1	1335	1335	CC	1A	23.9	11	other	duplication
yes	1588	CC45RL1	1335	1335	CC	1A	23.9	14	other	duplication
yes	1589	CC45RS1	1335	1335	CC	1A	23.9	5	snp	C->T	mis-sense	P772L	RSP5	YER125W
yes	1589	CC45RS1	1335	1335	CC	1A	23.9	11	other	duplication
yes	1590	CC109RL1	1335	1335	CC	1A	151.4	5	snp	C->T	mis-sense	P772L	RSP5	YER125W
yes	1590	CC109RL1	1335	1335	CC	1A	151.4	16	snp	A->G	mis-sense	M416V	TYW1	YPL207W
yes	1591	CC109RS1	1335	1335	CC	1A	151.4	4	snp	C->G	mis-sense	A221G	YDL211C	YDL211C
yes	1591	CC109RS1	1335	1335	CC	1A	151.4	4	snp	T->C	silent	I36I	CIA1	YDR267C
yes	1591	CC109RS1	1335	1335	CC	1A	151.4	5	snp	C->T	mis-sense	P772L	RSP5	YER125W
yes	1591	CC109RS1	1335	1335	CC	1A	151.4	5	snp	C->T	silent	N28N	EAF5	YEL018W
yes	1591	CC109RS1	1335	1335	CC	1A	151.4	6	snp	C->G	non-sense	Y475*	DUG1	YFR044C
yes	1591	CC109RS1	1335	1335	CC	1A	151.4	10	snp	A->G	mis-sense	H617R	YJL045W	YJL045W
yes	1591	CC109RS1	1335	1335	CC	1A	151.4	12	snp	C->A	non-sense	Y111*	MET17	YLR303W
yes***	1591	CC109RS1	1335	1335	CC	1A	151.4	13	snp	T->C	mis-sense	F428S	STB4	YMR019W
yes	1591	CC109RS1	1335	1335	CC	1A	151.4	15	snp	C->T	mis-sense	A94V	MDM20	YOL076W
yes	1591	CC109RS1	1335	1335	CC	1A	151.4	11	other	duplication
yes	1591	CC109RS1	1335	1335	CC	1A	151.4	14	other	duplication
yes	1591	CC109RS1	1335	1335	CC	1A	151.4	16	other	duplication
yes	1592	JR26	1335	1335	JP	3B	13.7	15	snp	G->del	frameshift	M203frameshift	WHI2	YOR043W
yes	1592	JR26	1335	1335	JP	3B	13.7	4	snp	C->G	mis-sense	P309A	BRE4
yes	1593	JR30	1335	1335	JP	3B	13.7	14	other	duplication
yes	1594	JR33	1335	1335	JP	3B	34.2	2	snp	A->T	non-sense	R742*	ECM21	YBL101C
yes	1594	JR33	1335	1335	JP	3B	34.2	12	snp	C->T	mis-sense	S140L	ATG39	YLR312C
yes	1594	JR33	1335	1335	JP	3B	34.2	15	snp	T->G	mis-sense	I133M	SPR1	YOR190W
yes	1594	JR33	1335	1335	JP	3B	34.2	14	other	duplication
yes	1594	JR33	1335	1335	JP	3B	34.2	16	other	duplication
yes	1595	JR37	1335	1335	JP	3B	34.2	2	snp	A->T	non-sense	R742*	ECM21	YBL101C
yes	1595	JR37	1335	1335	JP	3B	34.2	5	snp	C->G	silent	T434T	YEL023C	YEL023C
yes	1595	JR37	1335	1335	JP	3B	34.2	14	other	duplication
yes	1595	JR37	1335	1335	JP	3B	34.2	16	other	duplication
yes	1596	JR54	1335	1335	JP	3B	63.2	2	snp	A->T	non-sense	R742*	ECM21	YBL101C
yes	1596	JR54	1335	1335	JP	3B	63.2	5	snp	G->A	mis-sense	R742H	RSP5	YER125W
yes	1596	JR54	1335	1335	JP	3B	63.2	12	snp	C->T	mis-sense	T229I	YLR177W	YLR177W
yes	1596	JR54	1335	1335	JP	3B	63.2	12	other	duplication
yes	1596	JR54	1335	1335	JP	3B	63.2	14	other	duplication
Appear in all ACI lines								7	snp	C->A	mis-sense	L1099I	UBR1	YGR184C
yes	1601	ACI11	1335	1335	AC	7.Line1	30	2	deletion		frameshift	D652framshift	ECM21	YBL101C
yes	1601	ACI11	1335	1335	AC	7.Line1	30	9	snp	G->T	mis-sense	E654D	NEO1	YIL048W
yes	1601	ACI11	1335	1335	AC	7.Line1	30	14	other	duplication
yes	1602	ACI16	1335	1335	AC	7.Line1	30	2	snp	G->T	non-sense	E216*	ECM21	YBL101C
yes	1602	ACI16	1335	1335	AC	7.Line1	30	7	snp	A->G	mis-sense	N11S	SEC27	YGL137W
yes	1602	ACI16	1335	1335	AC	7.Line1	30	10	snp	T->A	mis-sense	N196K	RCY1	YJL204C
yes	1602	ACI16	1335	1335	AC	7.Line1	30	12	snp	A->T	non-sense	R397*	SFP1	YLR403W
yes	1602	ACI16	1335	1335	AC	7.Line1	30	13	snp	G->A	mis-sense	R686K	SOK2	YMR016C
yes	1602	ACI16	1335	1335	AC	7.Line1	30	14	other	duplication
yes	1603	ACI17	1335	1335	AC	7.Line2	30	2	snp	C->T	mis-sense	P886S	ECM21	YBL101C
yes	1603	ACI17	1335	1335	AC	7.Line2	30	2	snp	A->G	mis-sense	K505E	SAF1	YBR280C
yes	1603	ACI17	1335	1335	AC	7.Line2	30	4	snp	G->T	mis-sense	A245S	PAM1	YDR251W
yes	1603	ACI17	1335	1335	AC	7.Line2	30	8	snp	C->A	mis-sense	S315Y	SFB3	YHR098C
yes	1603	ACI17	1335	1335	AC	7.Line2	30	11	other	duplication
yes	1603	ACI17	1335	1335	AC	7.Line2	30	14	other	duplication
yes	1603	ACI17	1335	1335	AC	7.Line2	30	16	other	duplication
yes	1604	ACI22	1335	1335	AC	7.Line3	30	2	deletion		frameshift	T586frameshift	ECM21	YBL101C
yes	1604	ACI22	1335	1335	AC	7.Line3	30	6	snp	G->T	non-sense	E728*	MET10	YFR030W
yes	1604	ACI22	1335	1335	AC	7.Line3	30	12	snp	A->C	mis-sense	L210F	CRR1	YLR213C
yes	1604	ACI22	1335	1335	AC	7.Line3	30	12	snp	C->G	mis-sense	T57S	RPP0	YLR340W
yes	1604	ACI22	1335	1335	AC	7.Line3	30	14	other	duplication
yes	1605	ACI25	1335	1335	AC	7.Line3	30	2	deletion		frameshift	T586frameshift	ECM21	YBL101C
yes	1605	ACI25	1335	1335	AC	7.Line3	30	7	snp	A->T	non-sense	K324*	ALK1	YGL021W
yes	1605	ACI25	1335	1335	AC	7.Line3	30	12	deletion		frameshift	A107frameshfit	SFP1	YLR403W
yes	1605	ACI25	1335	1335	AC	7.Line3	30	14	other	duplication
yes	1606	ACI28	1335	1335	AC	11.Line1	19	2	snp	G->T	non-sense	E688*	ECM21	YBL101C
yes	1606	ACI28	1335	1335	AC	11.Line1	19	8	snp	A->C	mis-sense	D212A	NPR3	YHL023C
yes	1606	ACI28	1335	1335	AC	11.Line1	19	12	snp	G->A	mis-sense	V216M	VPS34	YLR240W
yes	1606	ACI28	1335	1335	AC	11.Line1	19	14	other	duplication
yes	1606	ACI28	1335	1335	AC	11.Line1	19	16	other	duplication
yes	1607	ACI33	1335	1335	AC	11.Line2	19	5	snp	A->G	304 bp upstream		RSP5	YER125W
yes	1607	ACI33	1335	1335	AC	11.Line2	19	5	snp	C->A	non-sense	S573*	CHD1	YER164W
yes	1608	ACI92	1335	1335	AC	11.Line1	19	4	snp	G->T	mis-sense	Q428H	RAD30	YDR419W
yes	1608	ACI92	1335	1335	AC	11.Line1	19	5	snp	G->A	281 bp upstream		RSP5	YER125W
yes	1608	ACI92	1335	1335	AC	11.Line1	19	13	snp	G->A	mis-sense	G37D	HUG1	YML058W-A
yes	1609	ACI160	1335	1335	AC	11.Line2	50	2	deletion		framshift	E793frameshift	ECM21	YBL101C
yes	1609	ACI160	1335	1335	AC	11.Line2	50	4	snp	A->C		Q288P	LYS14	YDR034C
yes	1609	ACI160	1335	1335	AC	11.Line2	50	5	snp	C->T	non-sense	Q127*	EAF5	YEL018W
yes	1609	ACI160	1335	1335	AC	11.Line2	50	7	snp	A->T	mis-sense	K111I	GCN5	YGR252W
yes	1609	ACI160	1335	1335	AC	11.Line2	50	16	snp	T->A	non-sense	L148*	GDE1	YPL110C
yes	1609	ACI160	1335	1335	AC	11.Line2	50	16	snp	A->T	mis-sense	S162C	LGE1	YPL055C
yes	1609	ACI160	1335	1335	AC	11.Line2	50	14	other	duplication
